# Supplementary material
Source: HighWire-hosted journal article supplement (https://www.cmajopen.ca/highwire/filestream/80826/field_highwire_adjunct_files/0/open-2014-0028-1-at.pdf)
Supplement: open-2014-0028-1-at.pdf [file open-2014-0028-1-at.pdf]

## Appendix 1: Supplementary tables and figures

Supplementary Table 1

| Reason for exclusion                                                                                                  | Excluded restaurants                                                                                                                                                                                                                                                                                                                                                                                                                                                                                                                                                                                                                                                                                                                                                                                                                                                                                                                                                                                                                                                                                                                                                                                                                                                                                                                                                                                                             |
|-----------------------------------------------------------------------------------------------------------------------|----------------------------------------------------------------------------------------------------------------------------------------------------------------------------------------------------------------------------------------------------------------------------------------------------------------------------------------------------------------------------------------------------------------------------------------------------------------------------------------------------------------------------------------------------------------------------------------------------------------------------------------------------------------------------------------------------------------------------------------------------------------------------------------------------------------------------------------------------------------------------------------------------------------------------------------------------------------------------------------------------------------------------------------------------------------------------------------------------------------------------------------------------------------------------------------------------------------------------------------------------------------------------------------------------------------------------------------------------------------------------------------------------------------------------------|
| Did not provide sodium data                                                                                           | Freshslice, Starbucks and Topper's Pizza                                                                                                                                                                                                                                                                                                                                                                                                                                                                                                                                                                                                                                                                                                                                                                                                                                                                                                                                                                                                                                                                                                                                                                                                                                                                                                                                                                                         |
| Did not provide serving size data                                                                                     | Booster Juice, Captain Sub, Good Earth Coffeehouse, The Keg, Milestones, Pizza Salvatore, Wendy's and Quiznos                                                                                                                                                                                                                                                                                                                                                                                                                                                                                                                                                                                                                                                                                                                                                                                                                                                                                                                                                                                                                                                                                                                                                                                                                                                                                                                    |
| Only provided data for beverages and ice cream                                                                        | Baskin Robbins, Blenz Coffeehouse, Esquires Coffeehouse, Freshly Squeezed, La Cremiere, MarbleSlab Creamery, Second Cup, TCBY and Yogen Fruz                                                                                                                                                                                                                                                                                                                                                                                                                                                                                                                                                                                                                                                                                                                                                                                                                                                                                                                                                                                                                                                                                                                                                                                                                                                                                     |
| Substantially changed the presentation of the data                                                                    | Smitty's and Mucho Burrito                                                                                                                                                                                                                                                                                                                                                                                                                                                                                                                                                                                                                                                                                                                                                                                                                                                                                                                                                                                                                                                                                                                                                                                                                                                                                                                                                                                                       |
| Only provided data specific to the US                                                                                 | Applebees, Cinnabon, Domino's Pizza, Godfather's Pizza, Nandos Flame Grilled Chicken, Popeyes Chicken and Biscuits and Papa John's Pizza                                                                                                                                                                                                                                                                                                                                                                                                                                                                                                                                                                                                                                                                                                                                                                                                                                                                                                                                                                                                                                                                                                                                                                                                                                                                                         |
| Reported nutrition information in 2010 but not in 2013                                                                | Jimmy the Greek, Lick's, Mega Wraps and Mary Brown's Chicken                                                                                                                                                                                                                                                                                                                                                                                                                                                                                                                                                                                                                                                                                                                                                                                                                                                                                                                                                                                                                                                                                                                                                                                                                                                                                                                                                                     |
| Cafeteria supplier                                                                                                    | Aramark                                                                                                                                                                                                                                                                                                                                                                                                                                                                                                                                                                                                                                                                                                                                                                                                                                                                                                                                                                                                                                                                                                                                                                                                                                                                                                                                                                                                                          |
| The following restaurants had greater than 20 outlets in 2010 and did not report nutrition information online in 2010 | abc Country Restaurant, Au Vieux Duluth Express, Bean Around the World Coffees, Beaver Tails, Bourbon Street Grill, Cactus Club Café, Café on the Go, Café Presse, Café Supreme, Café Vienne, 2 for 1 Pizza in Canada, Casa Grecque, Chez Ashton, Chez Coras, Chicken Chef, Chicken Delight, Coffee Culture Café, Crabby' Joe's Tap and Grill, Cultures, Delta Hotels, Dixie Lee Chicken and Seafood, Double Double Pizza & Chicken, Double Pizza, Eggsquis, Family Pizza, Fit for Life, Flaming Wok, Free Topping Pizza, Gabriel Pizza, Gino's Pizza, Golden Griddle, Grandma Lee's Bakery and Café, Greco Pizza-Donair, Humpty's Family Restaurant, Husky House Restaurant, Jungle Jim's, Koryo Korean BBQ, Koya Japan, La Piazzetta, Le Muffin Plus, Les Rotisseries Fusee, Mamma's Pizza, Mandarin, Moxie's Bar and Grill/Classic Grill, Original Joe's, Pacini, Panzerotto Pizza, Pizza Depot, Pizza Shack, Pretzelmaker, Red Lobster, Restaurant Amir, Restaurant Normandin, Ricky's All Day Grill, Saint Cinnamon, Select Sandwich Co, Serious Coffee, Square Boys Pizza and Subs, St. Hubert, St. Louis Bar and Grill, Sukiyaki - A Japanese Delight, Sunset Grill, Sushi Shop, Tea Shop 168, The Bagel Stop, The Firkin Group of Pubs, The Pantry Restaurant, Tiki-Ming, Tony Roma's A Place for Ribs, Tutti Fruitti Dejeuners, Valentine, Vern's Pizza, Villa Madina, Wild Wing, Williams Fresh Café and Wimpy's Diner |

**Supplementary Figure 1** Distribution of the sodium level (mg/serving) in Canadian chain restaurant foods (n=2198) in 2010 and 2013

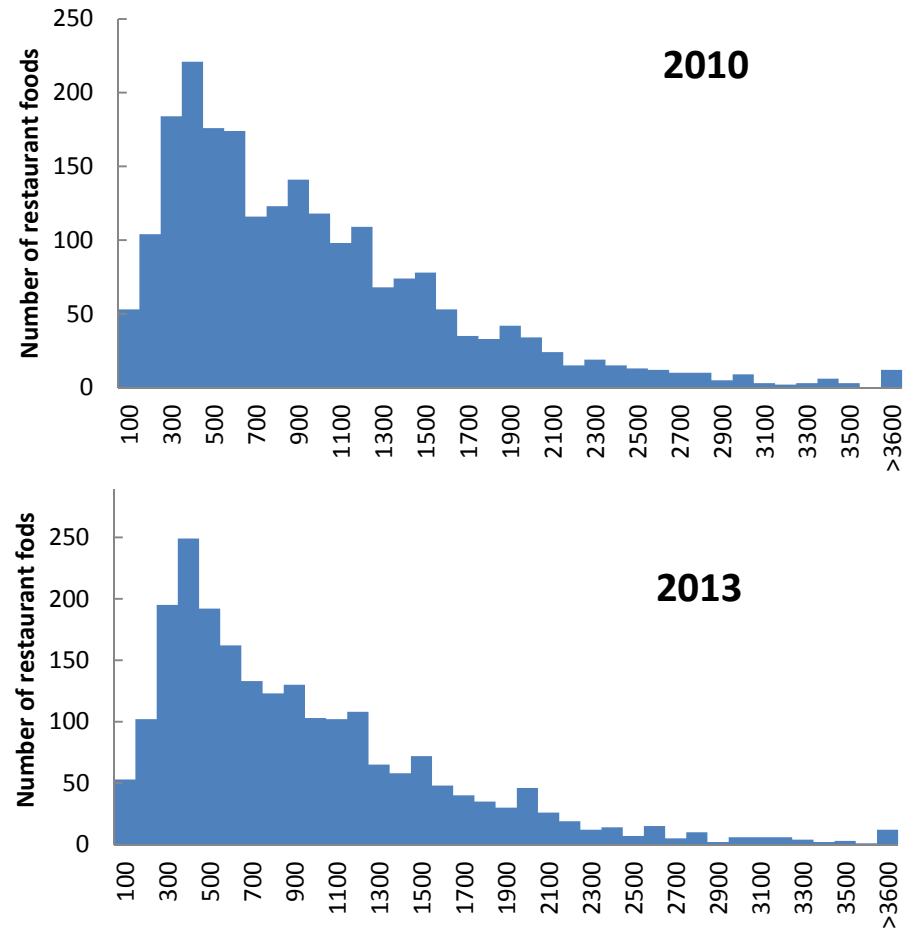

**Supplementary Table 2** Changes in sodium levels from 2010 to 2013 among baked goods, desserts and side dishes (n=803)

|                                        |     | Sodium level (mg/serving),<br>mean±SD§ |           |                                                    |                                                                                                                     |                                                    |                                                                                                            |
|----------------------------------------|-----|----------------------------------------|-----------|----------------------------------------------------|---------------------------------------------------------------------------------------------------------------------|----------------------------------------------------|------------------------------------------------------------------------------------------------------------|
|                                        | n   | 2010                                   | 2013      | Percentage<br>of foods<br>that<br>decreased<br>(%) | Average<br>percent change<br>in sodium<br>among foods<br>that<br>decreased,<br>median (25th,<br>75th<br>percentile) | Percentage<br>of foods<br>that<br>increased<br>(%) | Average percent<br>change in sodium<br>among foods that<br>increased, median<br>(25th, 75th<br>percentile) |
| <b>Baked Goods and Desserts</b>        |     |                                        |           |                                                    |                                                                                                                     |                                                    |                                                                                                            |
| Other Baked Goods                      | 14  | 439±298                                | 461±283   | 14                                                 | -6±1                                                                                                                | 29                                                 | 48 (26, 94)                                                                                                |
| Muffins                                | 87  | 432±159                                | 423±150   | 8                                                  | -18±15                                                                                                              | 1                                                  | 5                                                                                                          |
| SDR Desserts                           | 92  | 332±238                                | 342±285   | 11                                                 | -47±28                                                                                                              | 16                                                 | 20 (6, 90)                                                                                                 |
| Donuts                                 | 49  | 283±60                                 | 283±60    | 0                                                  | 0                                                                                                                   | 0                                                  | 0                                                                                                          |
| Pastries                               | 16  | 273±91                                 | 304±92    | 19                                                 | -11±8                                                                                                               | 25                                                 | 97 (53, 135)                                                                                               |
| Cookies                                | 45  | 179±95                                 | 174±97    | 22                                                 | -19±9                                                                                                               | 7                                                  | 29 (19, 37)                                                                                                |
| <b>Side Dishes</b>                     |     |                                        |           |                                                    |                                                                                                                     |                                                    |                                                                                                            |
| Soup (fast-food)                       | 120 | 1087±535                               | 1061±497‡ | 15                                                 | -11 (-15, -9)                                                                                                       | 0                                                  | 0                                                                                                          |
| Soup (sit-down restaurants)            | 51  | 979±431                                | 873±470*  | 39                                                 | -26 (-56, -12)                                                                                                      | 16                                                 | 21 (14, 42)                                                                                                |
| Fries (sit-down restaurants)           | 15  | 818±523                                | 892±593   | 33                                                 | -23 (-27, -7)                                                                                                       | 27                                                 | 33 (21, 60)                                                                                                |
| Fries (fast-food)                      | 15  | 776±445                                | 781±487   | 36                                                 | -30 (-33, -8)                                                                                                       | 7                                                  | 237                                                                                                        |
| Rice                                   | 13  | 684±704                                | 660±705   | 15                                                 | -43 (-58, -29)                                                                                                      | 15                                                 | 100                                                                                                        |
| Potatoes (baked, roasted or<br>mashed) | 20  | 540±356                                | 546±362   | 10                                                 | -16 (-19, -12)                                                                                                      | 10                                                 | 26 (20, 28)                                                                                                |
| Salad                                  | 45  | 378±175                                | 402±187   | 22                                                 | -27 (-31, -19)                                                                                                      | 31                                                 | 49 (18, 121)                                                                                               |
| Coleslaw                               | 12  | 354±135                                | 324±144   | 25                                                 | -37 (-47, -14)                                                                                                      | 0                                                  | 0                                                                                                          |

|            |    |         |         |    |                |    |                |
|------------|----|---------|---------|----|----------------|----|----------------|
| Vegetables | 23 | 232±250 | 220±220 | 17 | -36 (-66, -21) | 13 | 245 (156, 416) |
|------------|----|---------|---------|----|----------------|----|----------------|

\*Paired t-tests, p<0.05, †p<0.01, ‡p<0.001, §standard deviation

|| Medians were reported to prevent extreme values from skewing the average

**Supplementary Table 3** Changes in sodium density (mg/100g) from 2010 to 2013 in various food categories from Canadian chain sit-down and fast-food restaurants (n=2198)

|                                                         | n  | Sodium density (mg/100g), mean±SD§ |          | Percentage of foods that decreased (%) | Average percent change in sodium among foods that decreased, median (25th, 75th percentile) | Percentage of foods that increased (%) | Average percent change in sodium among foods that increased, median (25th, 75th percentile) |
|---------------------------------------------------------|----|------------------------------------|----------|----------------------------------------|---------------------------------------------------------------------------------------------|----------------------------------------|---------------------------------------------------------------------------------------------|
|                                                         |    | 2010                               | 2013     |                                        |                                                                                             |                                        |                                                                                             |
| <b>Sit-Down Restaurants</b>                             |    |                                    |          |                                        |                                                                                             |                                        |                                                                                             |
| Pizza                                                   | 93 | 524±154                            | 433±149‡ | 90                                     | -17 (-32, -6)                                                                               | 10                                     | 10 (8, 12)                                                                                  |
| Sandwiches/Wraps                                        | 73 | 507±194                            | 534±218  | 22                                     | -9 (-21, -8)                                                                                | 34                                     | 12 (6, 35)                                                                                  |
| Chicken                                                 | 42 | 456±206                            | 432±197  | 26                                     | -21 (-44, -5)                                                                               | 19                                     | 19 (0.5, 42)                                                                                |
| Entrées w/ multiple meats and seafood (ex. surf n turf) | 12 | 454±178                            | 455±176  | 25                                     | -3 (-3, -1)                                                                                 | 8                                      | 12                                                                                          |
| Hamburgers                                              | 39 | 415±135                            | 443±128  | 33                                     | -41 (-45, -28)                                                                              | 28                                     | 43 (19, 94)                                                                                 |
| Ribs                                                    | 19 | 407±114                            | 416±129  | 5                                      | -131                                                                                        | 16                                     | 18 (18, 35)                                                                                 |
| Breakfast                                               | 74 | 389±143                            | 389±142  | 27                                     | -18 (-28, -5)                                                                               | 19                                     | 24 (8, 68)                                                                                  |
| Pasta Entrée                                            | 76 | 334±113                            | 305±110‡ | 62                                     | -9 (-22, -4)                                                                                | 18                                     | 8 (1, 17)                                                                                   |
| Salad Entrée                                            | 19 | 325±152                            | 340±151  | 32                                     | -19 (-23, -18)                                                                              | 37                                     | 32 (3, 179)                                                                                 |
| Steak and other Beef Entrees                            | 36 | 319±301                            | 320±288  | 19                                     | -37 (-54, -21)                                                                              | 22                                     | 55 (27, 148)                                                                                |
| Stir Fry                                                | 10 | 319±135                            | 347±149  | 10                                     | -41                                                                                         | 40                                     | 46 (14, 93)                                                                                 |
| Seafood                                                 | 24 | 311±217                            | 303±211  | 17                                     | -20 (-32, -8)                                                                               | 4                                      | 69                                                                                          |

|                                 |     |         |          |    |                |    |               |
|---------------------------------|-----|---------|----------|----|----------------|----|---------------|
| Salad Entrée w/Meat             | 41  | 294±97  | 306±103  | 17 | -13 (-17, -10) | 36 | 19 (3, 34)    |
| <b>Fast-Food</b>                |     |         |          |    |                |    |               |
| Hot Dogs                        | 13  | 818±60  | 773±82   | 77 | -7 (-11, -4)   | 15 | 11 (3, 20)    |
| Chicken                         | 47  | 619±174 | 559±163‡ | 42 | -19 (-35, -12) | 6  | 10 (10, 14)   |
| Poutine                         | 15  | 599±196 | 568±144  | 47 | -14 (-23, -5)  | 13 | 69 (8, 129)   |
| Sandwiches/Wraps                | 203 | 554±208 | 548±210  | 38 | -16 (-24, -8)  | 20 | 27 (9, 61)    |
| Tacos/Burritos                  | 61  | 522±264 | 424±124‡ | 72 | -22 (-35, -13) | 28 | 15 (2, 28)    |
| Hamburgers                      | 60  | 490±131 | 488±135  | 37 | -7 (-15, -5)   | 27 | 5 (2, 8)      |
| Breakfast                       | 113 | 474±191 | 459±181* | 53 | -12 (-15, -5)  | 13 | 2 (2, 8)      |
| Pizza                           | 263 | 397±119 | 402±123* | 26 | -5 (-10, -3)   | 30 | 12 (5, 16)    |
| Sushi                           | 11  | 342±71  | 388±112  | 0  | na             | 36 | 35 (14, 36)   |
| Stir Fry                        | 24  | 326±33  | 326±33   | 0  | na             | 0  | 0             |
| Salads w/Meat                   | 22  | 317±80  | 313±92   | 45 | -8 (-24, -3)   | 23 | 17 (3, 55)    |
| Pasta                           | 25  | 275±152 | 275±152  | 0  | na             | 0  | 0             |
| Salads                          | 20  | 208±94  | 218±90   | 47 | -31 (-45, -16) | 13 | 69 (34, 106)  |
| Stir Fry (no sodium/low sodium) | 37  | 208±56  | 208±56   | 0  | na             | 0  | 0             |
| <b>Kids' Menu Items</b>         |     |         |          |    |                |    |               |
| Fast-food kid's Meals           | 13  | 532±197 | 503±188  | 38 | -23 (-23, -4)  | 8  | 16            |
| Sit-Down Kid's Meals            | 68  | 438±196 | 419±193  | 31 | -18 (-34, -7)  | 15 | 7 (5, 43)     |
| Kid's Side Dishes               | 27  | 253±178 | 241±158  | 33 | -22 (-28, -18) | 28 | 183 (12, 263) |
| <b>Baked Goods and Desserts</b> |     |         |          |    |                |    |               |
| Other Baked Goods               | 14  | 425±183 | 456±177  | 0  | na             | 43 | 17 (3, 52)    |
| Donuts                          | 49  | 394±65  | 392±66   | 2  | -23            | 0  | 0             |
| Pastries                        | 16  | 368±199 | 381±127  | 19 | -3 (-46, -1)   | 25 | 67 (33, 96)   |
| Cookies                         | 45  | 339±115 | 335±106  | 18 | -21 (-26, -13) | 11 | 37 (35, 60)   |
| Muffins                         | 87  | 335±117 | 333±112  | 5  | -20 (-29, -9)  | 5  | 10 (9, 14)    |
| SDR Desserts                    | 92  | 172±113 | 173±115  | 9  | -40 (-69, -15) | 18 | 29 (4, 48)    |
| <b>Side Dishes</b>              |     |         |          |    |                |    |               |
| Fries (fast-food)               | 15  | 479±268 | 451±219  | 21 | -33 (-45, -19) | 14 | 84 (1, 168)   |

|                                     |     |         |          |    |                |    |                |
|-------------------------------------|-----|---------|----------|----|----------------|----|----------------|
| Rice                                | 13  | 369±321 | 355±314  | 23 | -29 (-50, -1)  | 15 | 122 (100, 145) |
| Fries (sit-down restaurants)        | 15  | 362±227 | 425±316  | 27 | -15 (-25, -3)  | 20 | 31 (6, 240)    |
| Soup (sit-down restaurants)         | 51  | 350±139 | 320±125* | 41 | -21 (-27, -11) | 16 | 17 (5, 52)     |
| Soup (fast-food)                    | 120 | 343±65  | 328±64‡  | 23 | -17 (-20, -10) | 1  | 3              |
| Coleslaw                            | 12  | 305±94  | 284±103  | 17 | -43 (-49, -37) | 8  | 15             |
| Potatoes (baked, roasted or mashed) | 20  | 243±159 | 238±160  | 20 | -19 (-29, -12) | 5  | 15 (1, 29)     |
| Salad                               | 45  | 243±125 | 247±120  | 31 | -23 (-35, -15) | 29 | 38 (16, 122)   |
| Vegetables                          | 23  | 171±168 | 166±151  | 17 | -29 (-60, -17) | 13 | 245 (163, 416) |

\*Paired t-tests, p<0.05, †p<0.01, ‡p<0.001, §standard deviation

|| Medians were reported to prevent extreme values from skewing the average

**Supplementary Table 4** Percentage of foods (n=1603) at each restaurant whose sodium density (sodium per 100g) increased or decreased, and the average percent change, in order of percentage of foods that decreased

| Restaurant | n  | Percentage of foods that decreased (%) | Average percent change in sodium (mg/100g) among foods that decreased, median (25th, 75th percentile) ‡ | Percentage of foods that increased (%) | Average percent change in sodium (mg/100g) among foods that increased, median (25th, 75th percentile) |
|------------|----|----------------------------------------|---------------------------------------------------------------------------------------------------------|----------------------------------------|-------------------------------------------------------------------------------------------------------|
| Subway*    | 51 | 82                                     | -16 (-23, -12)                                                                                          | 10                                     | 2 (2, 2)                                                                                              |
| Pizza Hut* | 73 | 79                                     | -29 (-36, -7)                                                                                           | 3                                      | 1 (0.15, 1)                                                                                           |
| Taco Time  | 18 | 78                                     | -35 (-50, -13)                                                                                          | 22                                     | 8 (1, 73)                                                                                             |
| Taco Bell* | 32 | 78                                     | -20 (-31, -13)                                                                                          | 9                                      | 8 (2, 10)                                                                                             |
| A&W        | 34 | 73                                     | -6 (-12, -5)                                                                                            | 15                                     | 2 (1, 2)                                                                                              |

|                                 |     |    |                |    |               |
|---------------------------------|-----|----|----------------|----|---------------|
| Boston Pizza                    | 106 | 72 | -9 (-20, -5)   | 18 | 10 (6, 15)    |
| Dairy Queen                     | 18  | 72 | -13 (-21, -4)  | 28 | 15 (1, 27)    |
| Shoeless Joe's                  | 18  | 67 | -20 (-27, -11) | 28 | 27 (25, 76)   |
| White Spot Triple O's           | 20  | 65 | -16 (-23, -15) | 0  | na            |
| KFC*                            | 24  | 62 | -23 (-36, -13) | 4  | 9†            |
| Dagwood Sandwiches and Subs     | 38  | 53 | -14 (-25, -7)  | 45 | 37 (12, 58)   |
| Burger King                     | 51  | 51 | -3 (-7, -1)    | 22 | 5 (3, 8)      |
| East Side Mario's               | 45  | 50 | -12 (-25, -5)  | 41 | 9 (3, 19)     |
| Mike's Restaurant               | 80  | 46 | -20 (-29, -12) | 44 | 23 (7, 82)    |
| Kelsey's                        | 44  | 45 | -16 (-33, -10) | 32 | 18 (3, 32)    |
| Arby's                          | 28  | 43 | -5 (-19, -2)   | 57 | 18 (5, 72)    |
| Panago                          | 171 | 43 | -6 (-12, -3)   | 44 | 12 (5, 16)    |
| White Spot Legendary Restaurant | 52  | 42 | -10 (-28, -5)  | 23 | 23 (8, 47)    |
| Mmmuffins                       | 46  | 37 | -19 (-20, -17) | 0  | na            |
| Montanas                        | 75  | 37 | -19 (-27, -4)  | 15 | 17 (8, 54)    |
| Taco Del Mar                    | 27  | 30 | -22 (-36, -13) | 70 | 26 (9, 55)    |
| Tim Hortons                     | 70  | 28 | -12 (-21, -3)  | 19 | 9 (8, 14)     |
| The Great Canadian Bagel        | 85  | 27 | -15 (-15, -15) | 0  | na            |
| Joey's Restaurant               | 20  | 25 | -26 (-40, -9)  | 75 | 35 (15, 94)   |
| McDonald's*                     | 46  | 30 | -7 (-15, -6)   | 22 | 10 (1, 17)    |
| Edo Japan                       | 18  | 22 | -9 (-10, -9)   | 0  | na            |
| Jack Astors                     | 24  | 21 | -36 (-50, -27) | 79 | 78 (30, 144)  |
| Harvey's                        | 25  | 20 | -14 (-19, -14) | 0  | na            |
| Mr. Greek                       | 35  | 17 | -31 (-44, -1)  | 6  | 132 (20, 244) |
| Scores Rotisserie               | 30  | 17 | -12 (-22, -11) | 20 | 8 (1, 19)     |
| Casey's                         | 46  | 11 | -34 (-49, -18) | 22 | 23 (18, 43)   |
| Pizza Delight                   | 34  | 9  | -4 (-7, -3)    | 6  | 13 (1, 25)    |
| New Orleans Pizza               | 20  | 5  | -38            | 90 | 53 (14, 74)   |
| Earl's Restaurant               | 28  | 0  | na             | 7  | 22 (3, 42)    |

|                |    |   |    |   |    |
|----------------|----|---|----|---|----|
| Extreme Pita   | 43 | 0 | na | 2 | 73 |
| Mrs. Vanelli's | 28 | 0 | na | 4 | 13 |

The following restaurants reported no changes in sodium level between 2010 and 2013: 241 Pizza, Baton Rouge, Coffee Time, Country Style, Denny's, Flying Wedge Pizza, Little Caesars, Manchu Wok, Mr. Sub, Pita Pit, Pizza 73, Pizza Nova, Pizzaville, Robin's Donuts, Swiss Chalet, Teriyaki Experience, Van Houtte's Bistro

The following restaurants were excluded from this table because they had <10 menu items included in this study: Bento Nouveau, Druxy's Deli, Jugo Juice, New York Fries, Opa, Orange Julius, Pizza Pizza, Treats

\*Indicates restaurants that have made a voluntary commitment to reducing the sodium level in their products

†When there was only one food that increased or decreased, the percent change in that food was presented without an indicator of variance

‡Medians were reported to prevent extreme values from skewing the average.

**Supplementary Table 5** Sodium levels in foods that were discontinued, newly reported or present in 2010 and 2013 (n=3878)

|                                | n    | sodium<br>(mg/serving) |
|--------------------------------|------|------------------------|
| Discontinued Foods             | 860  | 993±706*               |
| Newly Reported Foods           | 820  | 982±730                |
| Foods Present in 2010 and 2013 | 2198 | 892±679                |

\*F-value=1.25, p-value=0.3, when controlling for restaurant and food category, there was no significant difference among foods that were present in 2010 and 2013 in comparison to foods that were discontinued or newly reported.
